# Supplementary material
Source: publisher site journal article supplement (https://www.degruyter.com/publication/journal_key/JBNST/downloadAsset/JBNST_CfP%20German%20Pension%20Insurance.pdf)
Supplement: Supplementary file 1 [file JBNST_CfP%20German%20Pension%20Insurance.pdf]

# Call for Papers - Special Issue on 'Empirical Studies with Micro-Data from the German Pension Insurance'

Journal of Economics and Statistics (Jahrbücher für Nationalökonomie und Statistik)

## Guest editors

- Axel Börsch-Supan, Director, Munich Research Institute for the Economics of Aging and SHARE Analyses (MEA) (axel@boersch-supan.de)
- Martin Brussig, University Duisburg (martin.brussig@uni-due.de)
- Tatjana Mika, German Pension Insurance (DRV Bund) (tatjana.mika@drv-bund.de)

## Topic

For twenty years, the German Pension Insurance offers access to anonymized micro-data from the insurance records in its research data center (FDZ-RV). This data has provided an empirical basis for many research projects on old-age provision and income inequality as well as concerning rehabilitation and early retirement. Moreover, it has enabled research on methods and on population subgroups due to large sample sizes. Papers submitted for this special issue should be based on these cross-sectional or longitudinal micro-data. Contributions may deal with, but are not limited to, the following topics:

- Old-age security
- Income inequality, pension insurance entitlements
- Wealth inequality, wealth distribution, augmented wealth
- Early retirement and health inequality
- Migration and transnational social security
- Gender inequality, fertility and divorce
- Demographics
- Methods of record linkage, questions of validity and usability of process produced data.

All papers will be reviewed by one guest editor and two anonymous referees. Abstracts and papers should be submitted in English to <https://mc.manuscriptcentral.com/jbnst> as Original Article indicating that it is submitted for the Special Issue: '*German Pension Insurance*'.

Authors of papers belonging to the aims and scope of the call will be invited to present their results at a conference in Berlin, June 7, 2024. However, publication does not depend on attendance of the conference, but solely on the outcome of the review process.

If you are in doubt whether your paper might fit into the special issue, please contact the guest editors.

## Dates

|                               |                                |
|-------------------------------|--------------------------------|
| Submission of abstracts:      | before March 17, 2024          |
| Submission of full papers:    | before August 18, 2024         |
| Feedback from referees:       | no later than October 15, 2024 |
| Submission of revised papers: | before November 30, 2024       |

Finally accepted papers will be published immediately online ahead of print.
